# Supplementary material for: Lessons from a natural experiment: Allopatric morphological divergence and sympatric diversification in the Midas cichlid species complex are largely influenced by ecology in a deterministic way
Source: PubMed Central journal article supplement (PMC6121794; doi:10.1002/evl3.64), 2018-06-27

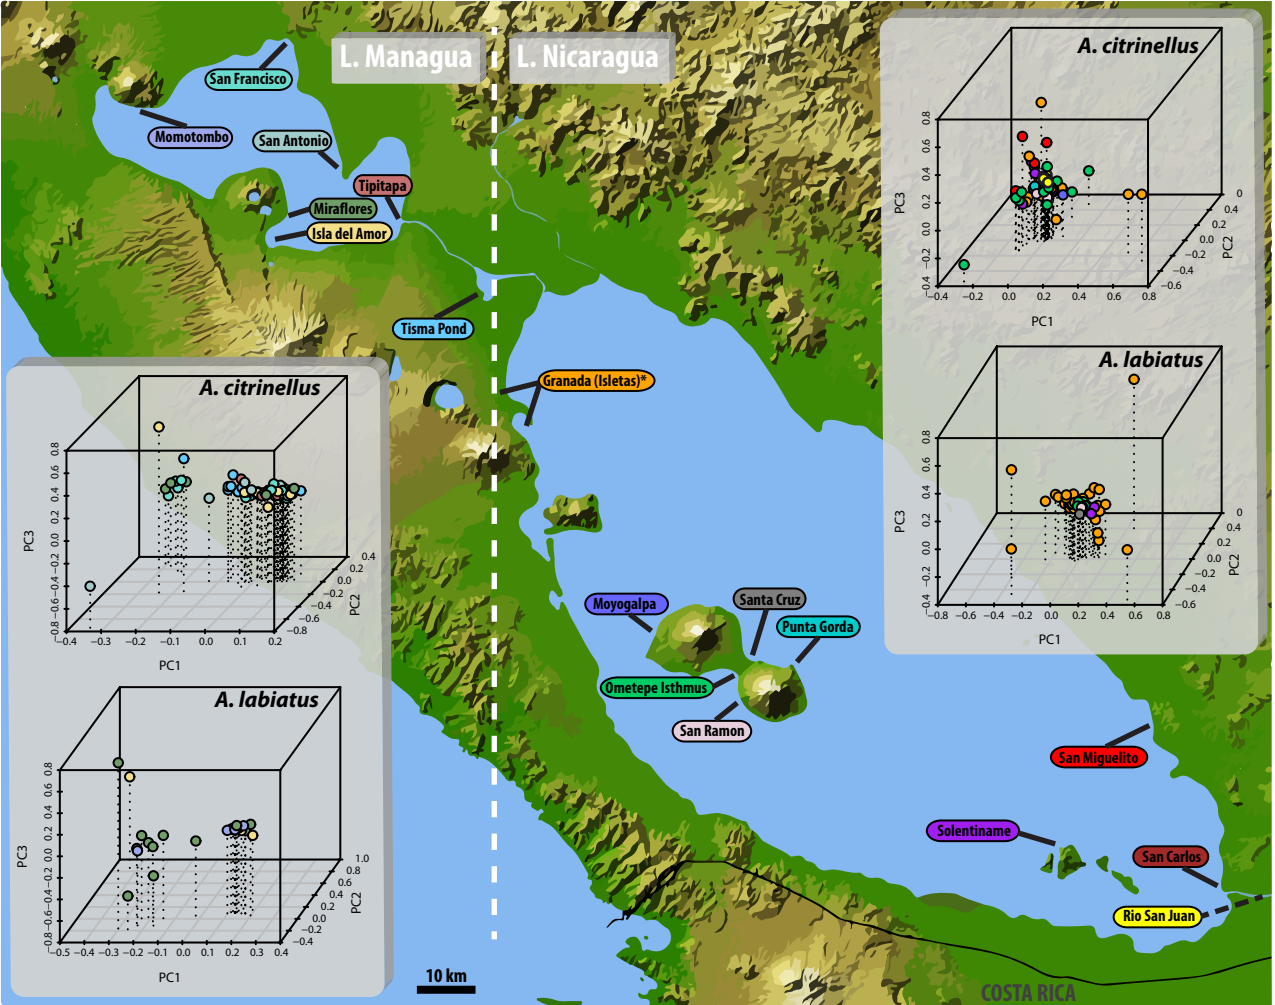

Supplement: EVL3-2-323-s004.pdf [file EVL3-2-323-s004.pdf]
