# Supplementary material for: Lessons from a natural experiment: Allopatric morphological divergence and sympatric diversification in the Midas cichlid species complex are largely influenced by ecology in a deterministic way
Source: PubMed Central journal article supplement (PMC6121794; doi:10.1002/evl3.64), 2018-06-27
Supplement: EVL3-2-323-s005.pdf [file EVL3-2-323-s005.pdf]

**A**

Morphological change

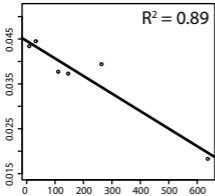

Founder pop. [ind]

**B**

Rate of change

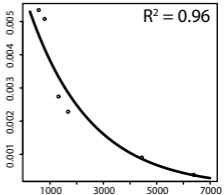

Colonization time [gen]
